# Supplementary material for: Prevalence, incidence and healthcare burden of eosinophilic granulomatosis with polyangiitis in the UK
Source: PubMed Central journal article supplement (PMC11089387; doi:10.1183/23120541.00430-2023), 2024-05-13
Supplement: 00430-2023.figure_S1.pdf [file 00430-2023.figure_S1.pdf]

Baseline period:  
12 months pre-index date

Post-index period:  
12 months post-index date

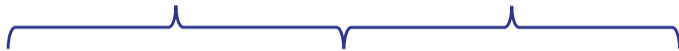

Data start: 1 Jan 2005

Index date: first EGPA diagnosis between  
1 Jan 2006 and 31 Dec 2018

Data end:  
31 Dec 2019

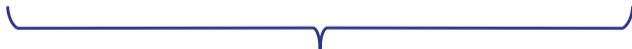

Yearly incidence rate observation period

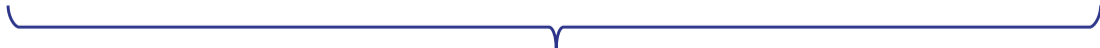

Yearly prevalence observation period
