# Supplementary material for: Prevalence, incidence and healthcare burden of eosinophilic granulomatosis with polyangiitis in the UK
Source: PubMed Central journal article supplement (PMC11089387; doi:10.1183/23120541.00430-2023), 2024-05-13
Supplement: 00430-2023.methods_and_table_S2.pdf [file 00430-2023.methods_and_table_S2.pdf]

## ***Supplementary Methods***

### **Sample size/Power calculations**

Feasibility assessment of the CPRD-AURUM database identified between 160 and 195 patients with a prevalent EGPA diagnosis recorded during any one year between 2014 and 2018, inclusive. Feasibility assessment of the CPRD-GOLD database identified 4,508,082 patients in 2014 with a minimum one year of data available. Assuming that the CPRD-GOLD database is representative of the UK population, that 84% of the UK population comprises people from England, and that EGPA prevalence in England is the same as that in the UK, CPRD-AURUM comprises an estimated 4.3 – 5.3 million patients with a minimum one year of data available.

The width of the 95% CIs for a range of assumed sample sizes and assumed prevalence and incidence of patients with EGPA were estimated and are shown in **Supplementary Table S2**.

**Supplementary Table S2. 95% CIs for (A) prevalence and (B) incidence estimates**

**A. 95% CIs for prevalence estimates**

| <b>Assumed sample size<br/>(million)</b> | <b>Assumed prevalence<br/>(per 1,000,000)</b> | <b>95% CI<br/>(per 1,000,000)</b> |
|------------------------------------------|-----------------------------------------------|-----------------------------------|
| 4                                        | 30                                            | (25.0, 36.0)                      |
| 4                                        | 35                                            | (29.5, 41.4)                      |
| 4                                        | 40                                            | (34.1, 46.8)                      |
| 5                                        | 30                                            | (25.5, 35.3)                      |
| 5                                        | 35                                            | (30.1, 40.7)                      |
| 5                                        | 40                                            | (34.7, 46.0)                      |
| 6                                        | 30                                            | (25.8, 34.8)                      |
| 6                                        | 35                                            | (30.5, 40.2)                      |
| 6                                        | 40                                            | (35.2, 45.5)                      |

**B. 95% CIs for incidence estimates**

| <b>Assumed sample size<br/>(million PY)</b> | <b>Assumed incidence<br/>(per 1,000,000 PY)</b> | <b>95% CI<br/>(per 1,000,000 PY)</b> |
|---------------------------------------------|-------------------------------------------------|--------------------------------------|
| 4                                           | 0.18                                            | (0.00, 1.17)                         |
| 4                                           | 1.20                                            | (0.34, 2.74)                         |
| 4                                           | 4.00                                            | (2.29, 6.50)                         |
| 5                                           | 0.18                                            | (0.00, 0.94)                         |
| 5                                           | 1.20                                            | (0.44, 2.61)                         |
| 5                                           | 4.00                                            | (2.44, 6.18)                         |
| 6                                           | 0.18                                            | (0.00, 0.93)                         |
| 6                                           | 1.20                                            | (0.47, 2.40)                         |
| 6                                           | 4.00                                            | (2.56, 5.95)                         |

CI: confidence interval; PY: person-years.
