# Supplementary material for: Prevalence, incidence and healthcare burden of eosinophilic granulomatosis with polyangiitis in the UK
Source: PubMed Central journal article supplement (PMC11089387; doi:10.1183/23120541.00430-2023), 2024-05-13
Supplement: 00430-2023.table_S1.pdf [file 00430-2023.table_S1.pdf]

**Supplementary Table S1. EGPA codes used to identify patients in CPRD-AURUM**

| MEDCODE ID        | Term                                   | EMIS code     | Cleansed READ code | SNOMED CT concept ID |
|-------------------|----------------------------------------|---------------|--------------------|----------------------|
| 11878901000006118 | EGPA                                   | ^ESCT1187890  |                    | 82275008             |
| 11878911000006115 | EGPA                                   | ^ESCT1187891  |                    | 82275008             |
| 3838311000006114  | EGPA                                   | ^ESCTEO383831 |                    | 82275008             |
| 3838321000006118  | Allergic<br>granulomatosis<br>angiitis | ^ESCTAL383832 |                    | 82275008             |
| 3838341000006113  | Allergic<br>granulomatous<br>angiitis  | ^ESCTAL383834 |                    | 82275008             |
| 3838351000006110  | Churg-Strauss<br>syndrome              | ^ESCTCS383835 |                    | 82275008             |
| 3838361000006112  | Churg Strauss<br>syndrome              | ^ESCTCH383836 |                    | 82275008             |
| 557151000006115   | Churg-Strauss<br>syndrome              |               | G758.00            | 82275008             |

EGPA: eosinophilic granulomatosis with polyangiitis; SNOMED: Systematised Nomenclature of Medicine Clinical Terms; ID: identifier.
