# Supplementary material for: Prevalence, incidence and healthcare burden of eosinophilic granulomatosis with polyangiitis in the UK
Source: PubMed Central journal article supplement (PMC11089387; doi:10.1183/23120541.00430-2023), 2024-05-13
Supplement: 00430-2023.table_S3.pdf [file 00430-2023.table_S3.pdf]

**Supplementary Table S3. Prevalence of EGPA in the UK from 2005 to 2019 stratified by age**

group

| Year | Age group, years     |                             |                      |                             |                      |                             |
|------|----------------------|-----------------------------|----------------------|-----------------------------|----------------------|-----------------------------|
|      | All                  |                             | 0–17                 |                             | ≥18                  |                             |
|      | EGPA prevalence*     | EGPA incidence <sup>†</sup> | EGPA prevalence*     | EGPA incidence <sup>†</sup> | EGPA prevalence*     | EGPA incidence <sup>†</sup> |
| 2005 | 22.7<br>(20.0, 25.7) | N/A                         | 0.51<br>(0.01, 2.84) | N/A                         | 27.5<br>(24.2, 31.2) | N/A                         |
| 2006 | 25.3<br>(22.4, 28.4) | 3.41<br>(2.38, 4.74)        | 0.50<br>(0.01, 2.79) | 0.00                        | 30.7<br>(27.2, 34.5) | 4.14<br>(2.88, 5.76)        |
| 2007 | 27.7<br>(24.7, 30.9) | 3.64<br>(2.58, 5.00)        | 0.49<br>(0.01, 2.73) | 0.00                        | 33.6<br>(30.0, 37.6) | 4.42<br>(3.13, 6.07)        |
| 2008 | 28.8<br>(25.8, 32.1) | 2.72<br>(1.82, 3.91)        | 0.48<br>(0.01, 2.67) | 0.00                        | 35.1<br>(31.4, 39.1) | 3.31<br>(2.22, 4.75)        |
| 2009 | 30.2<br>(27.1, 33.5) | 2.69<br>(1.80, 3.86)        | 0.47<br>(0.01, 2.61) | 0.00                        | 36.8<br>(33.1, 40.9) | 3.27<br>(2.19, 4.70)        |
| 2010 | 31.8<br>(28.7, 35.2) | 2.74<br>(1.85, 3.92)        | 0.46<br>(0.01, 2.55) | 0.00                        | 38.8<br>(35.0, 42.9) | 3.35<br>(2.26, 4.78)        |
| 2011 | 32.9<br>(29.7, 36.3) | 2.44<br>(1.61, 3.55)        | 0.00                 | 0.00                        | 40.4<br>(36.5, 44.5) | 2.98<br>(1.97, 4.34)        |
| 2012 | 35.6<br>(32.4, 39.1) | 3.46<br>(2.46, 4.73)        | 0.00                 | 0.00                        | 43.8<br>(39.8, 48.2) | 4.25<br>(3.02, 5.81)        |
| 2013 | 38.1<br>(34.7, 41.7) | 3.74<br>(2.70, 5.06)        | 0.00                 | 0.00                        | 47.0<br>(42.9, 51.4) | 4.61<br>(3.33, 6.24)        |
| 2014 | 40.6<br>(37.1, 44.3) | 4.00<br>(2.91, 5.35)        | 0.00                 | 0.00                        | 50.4<br>(46.1, 55.0) | 4.95<br>(3.61, 6.63)        |
| 2015 | 42.2<br>(38.7, 46.0) | 2.96<br>(2.05, 4.14)        | 0.00                 | 0.00                        | 52.6<br>(48.2, 57.2) | 3.68<br>(2.55, 5.14)        |
| 2016 | 42.5<br>(39.0, 46.2) | 2.71<br>(1.85, 3.83)        | 0.00                 | 0.00                        | 53.0<br>(48.6, 57.6) | 3.37<br>(2.31, 4.76)        |
| 2017 | 43.7<br>(40.2, 47.5) | 3.07<br>(2.16, 4.23)        | 0.00                 | 0.00                        | 54.5<br>(50.2, 59.2) | 3.82<br>(2.69, 5.27)        |
| 2018 | 44.9<br>(41.4, 48.6) | 2.68<br>(1.84, 3.76)        | 0.00                 | 0.00                        | 56.0<br>(51.6, 60.7) | 3.34<br>(2.30, 4.68)        |
| 2019 | 45.6<br>(42.1, 49.4) | 2.35<br>(1.57, 3.38)        | 0.37<br>(0.01, 2.09) | 0.41<br>(0.01, 2.30)        | 56.8<br>(52.4, 61.4) | 2.82<br>(1.88, 4.08)        |

\*Prevalence expressed as diagnosed EGPA cases per 1,000,000 persons (95% CI); <sup>†</sup>incidence expressed as newly diagnosed EGPA cases per 1,000,000 person-years (95% CI).

CI: confidence interval; N/A: not applicable.
